# Supplementary material for: Back to the Basics: Resting State Functional Connectivity of the Reticular Activation System in PTSD and its Dissociative Subtype
Source: PubMed Central journal article supplement (PMC7219926; doi:10.1177/2470547019873663), 2019-09-27
Supplement: CSS873663_Supplemental_Material.pdf [file CSS873663_Supplemental_Material.pdf]

## **S1 Supplemental Methods**

### Sample Description: Exclusion criteria

The present sample represents a subgroup of a previously published larger sample (see (1-8)). Here, we excluded five healthy control individuals to avoid differences in age across groups. In addition, two PTSD+DS, as well as two PTSD subjects were excluded as their brainstem had not been scanned completely (functional magnetic resonance imaging and anatomical magnetic resonance imaging, respectively). In general, participants were excluded if they had implants or metal that do not comply with 3T fMRI safety standards for research, a history of head injury with a loss of consciousness, significant untreated medical illness, a history of neurological disorders, history of any pervasive developmental disorders, pregnancy, and current use of any psychotropic medication within one month prior to study. PTSD individuals were further excluded if they reported a history of bipolar disorder, schizophrenia, or substance-use disorder prior to participation of the study.

### Statistical analysis: Sample characteristics

Age, PTSD symptom severity (CAPS total score), severity of childhood traumatization (CTQ total score), trait dissociative experiences (MDI total score, MDI derealization subscale, MDI depersonalization subscale), as well as state dissociative experiences (RSDI derealization and depersonalization), and state anxiety (STAI-S) were compared using one-way analysis of variance (ANOVA; multivariate ANOVA has been applied to compare MDI subscales). Gender and comorbid diagnosis were contrasted using Kruskal-Wallis Test.

Statistical significance was set to  $p < 0.05$ , and in case of significant effects, Bonferroni-corrected, post-hoc analyses were applied. All analyses were performed using SPSS (version 25; SPSS Inc., USA).

### RS functional connectivity: Analysis approach and statistical thresholding of the partial-brain analysis

RsFC analyses to voxels within the brainstem/cerebellum only (SUIT-space analyses, no additional ROI approach) were thresholded as follows: Within-group analyses were tested at a local significance threshold of  $p < 0.05$  (voxel level), corrected for multiple comparisons (FWE). Between-group analyses were tested at a local significance threshold of  $p < 0.05$ , uncorrected for multiple comparisons and results are reported that passed a threshold of  $p < .005$ , uncorrected for multiple comparisons.

**Table S1.** Resting state functional connectivity of the left pedunculo-pontine nuclei and brainstem and cerebellar regions within each group (one sample t-test, partial-brain level, i.e. SUI space)

|                 | L/R | Brain Region                             |    | k    | Z     | $p_{FWE-corr}$ | $p_{uncorr}$ | Peak MNI Coordinate |     |     |
|-----------------|-----|------------------------------------------|----|------|-------|----------------|--------------|---------------------|-----|-----|
|                 |     |                                          |    |      |       |                |              | x                   | y   | z   |
| <b>controls</b> |     |                                          |    |      |       |                |              |                     |     |     |
|                 | L   | Anterior Cerebellum I-IV                 | ** | 5    | 4.451 | 0.009          | <.001        | -2                  | -44 | -19 |
| <b>PTSD</b>     |     |                                          |    |      |       |                |              |                     |     |     |
|                 | L   | Pedunculo-pontine Nuclei/Locus Coeruleus | ** | 1258 | Inf   | <.001          | <.001        | -6                  | -32 | -23 |
|                 | R   | Pedunculo-pontine Nuclei/Locus Coeruleus | ** |      | 7.390 | <.001          | <.001        | 8                   | -34 | -21 |
|                 | R   | Superior Colliculi/midbrain RF           | ** |      | 6.145 | <.001          | <.001        | 8                   | -32 | -13 |
|                 | R   | Posterior Cerebellum VI                  | ** | 5    | 5.041 | 0.002          | <.001        | 30                  | -52 | -27 |
|                 | L   | Vermis Cerebellum IV-V                   | ** | 6    | 4.881 | 0.010          | <.001        | 2                   | -50 | -15 |
| <b>PTSD+DS</b>  |     |                                          |    |      |       |                |              |                     |     |     |
|                 | L   | Locus Coeruleus                          | ** | 747  | Inf   | <.001          | <.001        | -4                  | -32 | -21 |
|                 | R   | Anterior Cerebellum I-IV                 | ** |      | 6.130 | <.001          | <.001        | 20                  | -32 | -25 |
|                 | R   | Pedunculo-pontine Nuclei                 | ** |      | 6.058 | <.001          | <.001        | 10                  | -32 | -23 |

\*\* $p < 0.05$  (voxel-level), FWE corrected

*Legend:* PTSD = post-traumatic stress disorder; PTSD+DS = PTSD with the dissociative subtype; n.s.=no significant difference; k = cluster size;  $p_{uncorr}$  = p-value, uncorrected for multiple comparisons;  $p_{FWEcorr}$  = p-value, corrected for multiple comparisons (family wise error)

**Table S2.** Resting state functional connectivity of the right pedunclopontine nuclei and brainstem and cerebellar regions within each group (one sample t-test, partial-brain level, i.e. SUIT space)

|                 |   | Brain Region                           |    | k    | Z     | $p_{FWE-corr}$ | $p_{uncorr}$ | Peak MNI Coordinate |     |     |
|-----------------|---|----------------------------------------|----|------|-------|----------------|--------------|---------------------|-----|-----|
|                 |   |                                        |    |      |       |                |              | x                   | y   | z   |
| <b>controls</b> |   |                                        |    |      |       |                |              |                     |     |     |
| n.s.            |   |                                        |    |      |       |                |              |                     |     |     |
| <b>PTSD</b>     |   |                                        |    |      |       |                |              |                     |     |     |
|                 | R | Pedunclopontine Nuclei/Locus Coeruleus | ** | 1417 | Inf   | <.001          | <.001        | 8                   | -32 | -23 |
|                 | L | Pedunclopontine Nuclei/Locus Coeruleus | ** |      | 7.149 | <.001          | <.001        | -10                 | -30 | -21 |
|                 | L | Posterior Cerebellum VI                | ** |      | 6.832 | <.001          | <.001        | -12                 | -38 | -23 |
|                 | R | Anterior Cerebellum V                  | ** | 6    | 5.085 | 0.001          | <.001        | 8                   | -62 | -21 |
|                 | R | Posterior Cerebellum VI                | ** | 6    | 4.852 | 0.004          | <.001        | 20                  | -58 | -23 |
| <b>PTSD+DS</b>  |   |                                        |    |      |       |                |              |                     |     |     |
|                 | R | Pedunclopontine Nuclei/Locus Coeruleus | ** | 465  | Inf   | <.001          | <.001        | 8                   | -32 | -21 |
|                 | L | Periaqueductal Gray                    | ** |      | 6.797 | <.001          | <.001        | -2                  | -34 | -21 |
|                 | R | Ventral Tegmental Area                 | ** | 23   | 5.063 | 0.001          | <.001        | 2                   | -24 | -15 |
|                 | L | Substantia Nigra                       | ** |      | 4.877 | 0.003          | <.001        | -10                 | -16 | -9  |
|                 | R | Substantia Nigra                       | ** |      | 4.415 | 0.022          | <.001        | -4                  | -18 | -17 |
|                 | R | Anterior Cerebellum V                  | ** | 6    | 4.850 | 0.003          | <.001        | 28                  | -42 | -25 |
|                 | R | Anterior Cerebellum I-IV               | ** | 16   | 4.789 | 0.005          | <.001        | 0                   | -46 | -17 |
|                 | R | Anterior Cerebellum I-IV               | ** |      | 4.535 | 0.014          | <.001        | 0                   | -38 | -13 |

\*\* $p < 0.05$  (voxel-level), FWE corrected

*Legend:* PTSD = post-traumatic stress disorder; PTSD+DS = PTSD with the dissociative subtype; n.s.=no significant difference; k = cluster size;  $p_{uncorr}$  = p-value, uncorrected for multiple comparisons;  $p_{FWEcorr}$  = p-value, corrected for multiple comparisons (family wise error)

**Table S3.** Between-group comparisons of resting state functional connectivity of the left and right pedunculopontine nuclei and brainstem, as well as cerebellar regions (partial-brain level, i.e. SUI space)

|                              | L/R | Brain Region             | k | Z     | $p_{FWE-corr}$ | $p_{uncorr}$ | Peak MNI Coordinate |     |     |
|------------------------------|-----|--------------------------|---|-------|----------------|--------------|---------------------|-----|-----|
|                              |     |                          |   |       |                |              | x                   | y   | z   |
| <b>Main Effect of Group</b>  |     |                          |   |       |                |              |                     |     |     |
| n.s.                         |     |                          |   |       |                |              |                     |     |     |
| <b>Interaction Effect</b>    |     |                          |   |       |                |              |                     |     |     |
| n.s.                         |     |                          |   |       |                |              |                     |     |     |
| <b>Between-Group Effects</b> |     |                          |   |       |                |              |                     |     |     |
| controls > PTSD              |     |                          |   |       |                |              |                     |     |     |
| n.s.                         |     |                          |   |       |                |              |                     |     |     |
| controls > PTSD+DS           |     |                          |   |       |                |              |                     |     |     |
| n.s.                         |     |                          |   |       |                |              |                     |     |     |
| PTSD > controls              |     |                          |   |       |                |              |                     |     |     |
| n.s.                         |     |                          |   |       |                |              |                     |     |     |
| PTSD > PTSD+DS               |     |                          |   |       |                |              |                     |     |     |
| n.s.                         |     |                          |   |       |                |              |                     |     |     |
| PTSD+DS>controls             | R   | Anterior Cerebellum I-IV | 9 | 3.075 | 0.227          | 0.001        | 8                   | -48 | -27 |
|                              | L   | Anterior Cerebellum I-IV | 9 | 2.931 | 0.313          | 0.002        | -6                  | -52 | -21 |
| PTSD+DS>controls             | L   | Anterior Cerebellum V    | 7 | 3.452 | 0.083          | <.001        | -8                  | -54 | -11 |

\*\* $p_{uncorrected} < 0.005$  (voxel-level),  $k > 5$ .

*Legend:* PTSD = post-traumatic stress disorder; PTSD+DS = PTSD with the dissociative subtype; n.s.=no significant difference; k = cluster size;  $p_{uncorr}$  = p-value, uncorrected for multiple comparisons;  $p_{FWEcorr}$  = p-value, corrected for multiple comparisons (FWE)

**Table S4.** ROI resting state functional connectivity of the left pedunculopontine nuclei within each group (one sample t-test; whole-brain level)

| L/R             | Brain Region                                             |    | k   | Z    | $p_{FWE-corr}$ | $p_{uncorr}$ | Peak MNI Coordinate |     |     |
|-----------------|----------------------------------------------------------|----|-----|------|----------------|--------------|---------------------|-----|-----|
|                 |                                                          |    |     |      |                |              | x                   | y   | z   |
| <b>CONTROLS</b> |                                                          |    |     |      |                |              |                     |     |     |
| n.s.            |                                                          |    |     |      |                |              |                     |     |     |
| <b>PTSD</b>     |                                                          |    |     |      |                |              |                     |     |     |
| L               | Thalamus (anterior, lateral dorsal, pulvinar)            | ** | 231 | 4.24 | 0.003          | <.001        | -6                  | -16 | 14  |
| R               | Thalamus (anterior, lateral dorsal, pulvinar)            | ** | 136 | 3.79 | 0.011          | <.001        | 16                  | -28 | 14  |
| R               | Ventromedial Prefrontal Cortex/Anterior Cingulate Cortex | ** | 539 | 4.23 | 0.004          | <.001        | 14                  | 60  | -2  |
| <b>PTSD+DS</b>  |                                                          |    |     |      |                |              |                     |     |     |
| L               | Amygdala/Parahippocampal Gyrus                           | ** | 306 | 4.70 | <.001          | <.001        | -20                 | 2   | -16 |
| R               | Ventromedial Prefrontal Cortex/Anterior Cingulate Cortex | ** | 384 | 4.09 | 0.005          | <.001        | 16                  | -14 | 18  |
| R               | Ventromedial Prefrontal Cortex/Anterior Cingulate Cortex | ** | 610 | 3.88 | 0.009          | <.001        | 12                  | 52  | -8  |
| R               | Amygdala/Parahippocampal Gyrus                           | ** | 152 | 3.92 | 0.003          | <.001        | 28                  | -4  | -14 |

ROI approach: RS functional connectivity results are reported at a local significance threshold of  $**p < 0.0125$  (i.e., adjusted for number of ROIs), FWE corrected

*Legend:* PTSD = post-traumatic stress disorder; PTSD+DS = PTSD with the dissociative subtype; n.s.=no significant difference; k = cluster size;  $p_{uncorr}$  = p-value, uncorrected for multiple comparisons;  $p_{FWEcorr}$  = p-value, corrected for multiple comparisons (family wise error)

**Table S5.** ROI Resting state functional connectivity of the right pedunclopontine nuclei within each group (one sample t-test, whole-brain level)

| L/R             | Brain Region                                                 |    | k   | Z    | $p_{FWE-corr}$ | $p_{uncorr}$ | Peak MNI Coordinate |     |     |
|-----------------|--------------------------------------------------------------|----|-----|------|----------------|--------------|---------------------|-----|-----|
|                 |                                                              |    |     |      |                |              | x                   | y   | z   |
| <b>CONTROLS</b> |                                                              |    |     |      |                |              |                     |     |     |
| R               | Thalamus (anterior nucleus)                                  | ** | 91  | 4.57 | 0.001          | <.001        | 8                   | 0   | 6   |
| <b>PTSD</b>     |                                                              |    |     |      |                |              |                     |     |     |
| R               | Thalamus (anterior, medial dorsal, lateral dorsal, pulvinar) | ** | 716 | 5.97 | <.001          | <.001        | 12                  | -2  | 12  |
| L               | Amygdala/Parahippocampal Gyrus                               | ** | 82  | 4.84 | <.001          | <.001        | -26                 | -2  | -12 |
| L               | Thalamus (anterior, medial dorsal, lateral dorsal, pulvinar) | ** | 220 | 4.51 | 0.001          | <.001        | -12                 | -12 | 18  |
| R               | Ventromedial Prefrontal Cortex                               | ** | 486 | 4.15 | 0.005          | <.001        | 2                   | 64  | -10 |
| <b>PTSD+DS</b>  |                                                              |    |     |      |                |              |                     |     |     |
| R               | Thalamus (anterior, lateral dorsal, pulvinar)                | ** | 292 | 4.00 | 0.006          | <.001        | 16                  | -12 | 18  |
| L               | Amygdala/Parahippocampal Gyrus                               | ** | 116 | 3.65 | 0.006          | <.001        | -28                 | -4  | -12 |
| L               | Thalamus (medial dorsal nucleus, pulvinar)                   | ** | 332 | 3.93 | 0.009          | <.001        | -6                  | -16 | 10  |
| R               | Amygdala/Parahippocampal Gyrus                               | ** | 207 | 3.57 | 0.009          | <.001        | 24                  | 0   | -12 |
| L               | Ventromedial Prefrontal Cortex                               | ** | 503 | 3.75 | 0.012          | <.001        | -2                  | 48  | -10 |

ROI approach: RS functional connectivity results are reported at a local significance threshold of  $**p < 0.0125$  (i.e., adjusted for number of ROIs), FWE corrected

*Legend:* PTSD = post-traumatic stress disorder; PTSD+DS = PTSD with the dissociative subtype; n.s.=no significant difference; k = cluster size;  $p_{uncorr}$  = p-value, uncorrected for multiple comparisons;  $p_{FWEcorr}$  = p-value, corrected for multiple comparisons (family wise error)

**Table S6.** Between-group comparison of resting state functional connectivity of the pedunclopontine nuclei (whole-brain level)

|                                                 | L/R  | Brain Region                  | k  | Z     | pFWE-corr | puncorr | Peak MNI Coordinate |     |     |
|-------------------------------------------------|------|-------------------------------|----|-------|-----------|---------|---------------------|-----|-----|
|                                                 |      |                               |    |       |           |         | x                   | y   | z   |
| <b>Main Effect of Group</b>                     |      |                               |    |       |           |         |                     |     |     |
|                                                 | R    | Fusiform Gyrus                | 16 | 4.276 | 0.209     | <.001   | 28                  | -78 | -8  |
|                                                 | R    | Superior Frontal Gyrus        | 15 | 4.141 | 0.324     | <.001   | 14                  | 34  | 44  |
|                                                 | R    | Superior Occipital Gyrus      | 14 | 3.750 | 0.789     | <.001   | 22                  | -92 | 6   |
|                                                 | L    | Calcarine                     | 18 | 3.744 | 0.795     | <.001   | -8                  | -88 | -2  |
|                                                 | R    | Caudate                       | 20 | 3.671 | 0.866     | <.001   | 16                  | 16  | -4  |
|                                                 | R    | Anterior Cingulate Cortex     | 12 | 3.619 | 0.907     | <.001   | 20                  | 40  | 14  |
|                                                 | L    | Orbitofrontal Gyrus           | 13 | 3.615 | 0.910     | <.001   | -2                  | 50  | -12 |
|                                                 | R    | Middle Occipital Gyrus        | 15 | 3.605 | 0.917     | <.001   | 30                  | -80 | 8   |
| <b>Main Effect of Hemisphere</b>                |      |                               |    |       |           |         |                     |     |     |
| n.s.                                            |      |                               |    |       |           |         |                     |     |     |
| <b>Interaction Effect of Group x Hemisphere</b> |      |                               |    |       |           |         |                     |     |     |
| n.s.                                            |      |                               |    |       |           |         |                     |     |     |
| <b>Between-Group Comparison</b>                 |      |                               |    |       |           |         |                     |     |     |
| controls > PTSD                                 | R    | Supplementary Motor Area      | 10 | 3.442 | 0.956     | <.001   | 14                  | -16 | 54  |
| controls > PTSD+DS                              | n.s. |                               |    |       |           |         |                     |     |     |
| PTSD > controls                                 | R    | Anterior Cingulate Cortex     | 46 | 4195  | 0.227     | <.001   | 20                  | 40  | 14  |
|                                                 | R    | Caudate Nucleus               | 20 | 3821  | 0.619     | <.001   | 34                  | -40 | 10  |
|                                                 | R    | Superior Frontal Gyrus        | 21 | 3657  | 0.805     | <.001   | 22                  | 58  | 4   |
|                                                 | R    | Caudate Nucleus               | 20 | 3559  | 0.890     | <.001   | 18                  | 14  | 8   |
|                                                 | R    | Caudate Nucleus               | 15 | 3485  | 0.936     | <.001   | 16                  | 10  | 20  |
|                                                 | R    | Middle Frontal Gyrus          | 17 | 3482  | 0.938     | <.001   | 44                  | 6   | 38  |
| PTSD>PTSD+DS                                    | R    | Medial Superior Frontal Gyrus | 27 | 4466  | 0.086     | <.001   | 12                  | 34  | 44  |
|                                                 | R    | Middle Frontal Gyrus          | 15 | 3902  | 0.520     | <.001   | 24                  | 48  | 32  |
|                                                 | R    | Middle Frontal Gyrus          | 14 | 3823  | 0.616     | <.001   | 30                  | 28  | 30  |
|                                                 | R    | Middle Frontal Gyrus          | 20 | 3719  | 0.739     | <.001   | 26                  | 14  | 56  |
|                                                 | R    | Medial Superior Frontal Gyrus | 21 | 3560  | 0.889     | <.001   | 8                   | 42  | 48  |
|                                                 | R    | Middle Frontal Gyrus          |    | 3488  | 0.935     | <.001   | 18                  | 42  | 46  |

THE RAS DURING REST IN PTSD AND ITS DISSOCIATIVE SUBTYPE

|                  |              |                           |                          |      |       |       |     |     |     |    |
|------------------|--------------|---------------------------|--------------------------|------|-------|-------|-----|-----|-----|----|
| PTSD+DS>controls | R            | Caudate                   | 89                       | 4243 | 0.194 | <.001 | 16  | 16  | -4  |    |
|                  | R            | Lateral Globus Pallidus   |                          | 3341 | 0.984 | <.001 | 16  | 6   | -12 |    |
|                  | L            | Orbitofrontal Gyrus       | 79                       | 4145 | 0.267 | <.001 | -2  | 50  | -12 |    |
|                  | L            | Anterior Cingulate Cortex |                          | 3416 | 0.965 | <.001 | -4  | 44  | -2  |    |
|                  | R            | Superior Occipital Gyrus  | 65                       | 3825 | 0.614 | <.001 | 24  | -86 | 8   |    |
|                  | R            | Interior Occipital Gyrus  |                          | 3557 | 0.891 | <.001 | 32  | -84 | -2  |    |
|                  | R            | Fusiform Gyrus            | 18                       | 3774 | 0.675 | <.001 | 32  | -62 | -14 |    |
|                  | R            | Fusiform Gyrus            | 22                       | 3707 | 0.752 | <.001 | 28  | -78 | -8  |    |
|                  | R            | Calcarine                 | 31                       | 3691 | 0.770 | <.001 | 2   | -78 | 6   |    |
|                  | L            | Calcarine                 |                          | 3198 | 0.998 | .001  | -6  | -72 | 8   |    |
|                  | L            | Cuneus                    | 10                       | 3562 | 0.887 | <.001 | -6  | -98 | 6   |    |
|                  | R            | Fusiform Gyrus            | 14                       | 3485 | 0.936 | <.001 | 34  | -38 | -18 |    |
|                  | R            | Superior Frontal Gyrus    | 12                       | 3424 | 0.962 | <.001 | 18  | 54  | 8   |    |
|                  | PTSD+DS>PTSD | R                         | Fusiform Gyrus           | 24   | 4534  | 0.066 |     | 28  | -78 | -8 |
|                  |              | R                         | Superior Occipital Gyrus | 74   | 4315  | 0.151 |     | 22  | -92 | 8  |
| R                |              | Lingual Gyrus             |                          | 3680 | 0.782 |       | 24  | -90 | -2  |    |
| L                |              | Calcarine                 | 58                       | 4211 | 0.216 |       | -8  | -88 | -2  |    |
| R                |              | Middle Occipital Gyrus    | 35                       | 4138 | 0.272 |       | 30  | -80 | 8   |    |
| L                |              | Interior Temporal Gyrus   | 19                       | 4049 | 0.355 |       | -48 | -58 | -14 |    |
| L                |              | Superior Temporal Gyrus   | 21                       | 3854 | 0.577 |       | -46 | -26 | 2   |    |
| R                |              | Superior Temporal Gyrus   | 11                       | 3726 | 0.731 |       | 46  | -32 | 2   |    |
| R                |              | Amygdala                  | 13                       | 3713 | 0.745 |       | 28  | -6  | -14 |    |
| R                |              | Lentiform Nucleus         |                          | 3131 | 0.999 |       | 34  | 0   | -12 |    |
| L                |              | Orbitofrontal Gyrus       | 10                       | 3710 | 0.749 |       | -12 | 54  | -2  |    |
| L                |              | Middle Occipital Gyrus    | 24                       | 3698 | 0.762 |       | -36 | -76 | 8   |    |
| R                |              | Inferior Occipital Gyrus  | 20                       | 3697 | 0.763 |       | 38  | -66 | -6  |    |
| R                |              | Fusiform Gyrus            |                          | 3522 | 0.915 |       | 32  | -64 | -14 |    |
| R                |              | Calcarine                 | 11                       | 3645 | 0.817 |       | 18  | -84 | 2   |    |
| R                |              | Lingual Gyrus             | 13                       | 3602 | 0.856 |       | 36  | -76 | -4  |    |
| R                |              | Calcarine                 | 13                       | 3594 | 0.863 |       | 4   | -78 | 6   |    |
| L                |              | Lingual Gyrus             | 12                       | 3563 | 0.887 |       | -16 | -80 | -8  |    |
| L                |              | Orbitofrontal Gyrus       | 10                       | 3504 | 0.926 |       | -6  | 36  | -14 |    |



## THE RAS DURING REST IN PTSD AND ITS DISSOCIATIVE SUBTYPE

Whole-brain RS functional connectivity results are reported at a threshold of  $p < 0.001$  (voxel-level),  $k > 10$ , uncorrected for multiple comparisons

*Legend: PTSD = post-traumatic stress disorder; PTSD+DS = PTSD with the dissociative subtype; n.s.=no significant difference;  $k$  = cluster size;  $p_{uncorr}$  = p-value, uncorrected for multiple comparisons;  $p_{FWEcorr}$  = p-value, corrected for multiple comparisons (family-wise error)*

### S3 References

1. Harricharan S, Rabellino D, Frewen PA, Densmore M, Theberge J, McKinnon MC, et al. fMRI functional connectivity of the periaqueductal gray in PTSD and its dissociative subtype. *Brain and behavior*. 2016;6(12):e00579.
2. Nicholson AA, Sapru I, Densmore M, Frewen PA, Neufeld RW, Theberge J, et al. Unique insula subregion resting-state functional connectivity with amygdala complexes in posttraumatic stress disorder and its dissociative subtype. *Psychiatry Res Neuroimaging*. 2016;250:61-72.
3. Harricharan S, Nicholson AA, Densmore M, Theberge J, McKinnon MC, Neufeld RWJ, et al. Sensory overload and imbalance: Resting-state vestibular connectivity in PTSD and its dissociative subtype. *Neuropsychologia*. 2017;106:169-78.
4. Thome J, Densmore M, Frewen PA, McKinnon MC, Théberge J, Nicholson AA, et al. Desynchronization of autonomic response and central autonomic network connectivity in posttraumatic stress disorder. *Human brain mapping*. 2017;38(1):27-40.
5. Nicholson AA, Densmore M, McKinnon MC, Neufeld RWJ, Frewen PA, Theberge J, et al. Machine learning multivariate pattern analysis predicts classification of posttraumatic stress disorder and its dissociative subtype: a multimodal neuroimaging approach. *Psychological medicine*. 2018:1-11.
6. Rabellino D, Densmore M, Harricharan S, Jean T, McKinnon MC, Lanius RA. Resting-state functional connectivity of the bed nucleus of the stria terminalis in post-traumatic stress disorder and its dissociative subtype. *Human brain mapping*. 2018;39(3):1367-79.
7. Rabellino D, Densmore M, Theberge J, McKinnon MC, Lanius RA. The cerebellum after trauma: Resting-state functional connectivity of the cerebellum in posttraumatic stress disorder and its dissociative subtype. *Human brain mapping*. 2018;39(8):3354-74.
8. Terpou BA, Densmore M, Theberge J, Frewen P, McKinnon MC, Lanius RA. Resting-state pulvinar-posterior parietal decoupling in PTSD and its dissociative subtype. *Human brain mapping*. 2018.
